# Supplementary material for: Streptomyces sp. Strain MUSC 125 from Mangrove Soil in Malaysia with Anti-MRSA, Anti-Biofilm and Antioxidant Activities
Source: Molecules. 2020 Aug 3;25(15):3545. doi: 10.3390/molecules25153545 (PMC7435833; doi:10.3390/molecules25153545)
Supplement: Supplementary file 1 [file molecules-25-03545-s001.pdf]

## Supplementary materials

# ***Streptomyces* sp. strain MUSC 125 from mangrove soil in Malaysia: Anti-MRSA, anti-biofilm, antioxidant activities and chemical profiling of extract**

**Table S1. Cultural characteristics of strain MUSC 125**

| Media | Growth   | Colony colour         |                           | Soluble pigment         |
|-------|----------|-----------------------|---------------------------|-------------------------|
|       |          | Aerial mycelia        | Substrate mycelia         |                         |
| ISP2  | Well     | Yellowish white       | Brilliant Yellow          | -                       |
| ISP3  | Poor     | Vivid Greenish Yellow | Strong Greenish Yellow    | -                       |
| ISP4  | -        | -                     | -                         | -                       |
| ISP5  | Well     | Pale Yellowish Green  | Pale Yellow               | -                       |
| ISP6  | Well     | Greenish White        | Yellowish Grey            | Dark olive brown        |
| ISP7  | Well     | Yellowish White       | Greenish White            | -                       |
| AIA   | Moderate | Pale Yellowish green  | Brilliant Greenish Yellow | -                       |
| SCA   | Well     | Pale Yellowish green  | Pale Greenish Yellow      | -                       |
| SA    | Well     | Yellowish White       | Vivid Yellow              | -                       |
| NA    | Moderate | Greenish White        | Greenish Yellow           | Greyish greenish yellow |

- No growth or nor soluble pigment observed

**Table S2. Biochemical and physiological characteristics of strain MUSC 125**

| Characteristics                      | Strain MUSC 125 |
|--------------------------------------|-----------------|
| <b>Biochemical characteristics</b>   |                 |
| Catalase                             | +               |
| Haemolytic                           | -               |
| <b>Enzymatic test</b>                |                 |
| Chitinase activity (2.5 % chitin)    | -               |
| Xylanase activity (0.5 % xylan)      | -               |
| Amylolytic activity (0.2 % starch)   | +               |
| Protease activity (2 % casein)       | -               |
| Lipase activity (1 % tributyrin)     | +               |
| Cellulase activity (0.5 % CMC)       | -               |
| <b>Physiological characteristics</b> |                 |
| <b>Temperature (° C) tolerance</b>   |                 |
| Growth                               | 18-40           |
| Optimum                              | 32-36           |
| <b>NaCl (%) tolerance</b>            |                 |
| Growth                               | 0-6             |
| Optimum                              | 0-2             |
| <b>pH tolerance</b>                  |                 |
| Growth                               | 4-7             |
| Optimum                              | 7               |

-No activity; +Activity

**Table S3. Anti-MRSA susceptibility test of strain MUSC 125.**

| MRSA ATCC strain | Zone of inhibition (mm) at 10 mg/well |                    |              |
|------------------|---------------------------------------|--------------------|--------------|
|                  | MUSC 125                              | Vancomycin (30 µg) | DMSO (0.5 %) |
| 43300            | 19 ±0                                 | 15 ±0              | *6 ± 0       |
| 33591            | 19.33 ± 0.58                          | 15.33 ± 0.47       | *6± 0        |

\*6 ± 0 is the diameter of the agar well, therefore no activity (N= 3).

**Table S4. MIC and MBC of methanolic extract of strain MUSC 125.**

| MRSA ATCC | MIC (mg/mL) | MBC (mg/mL) | Vancomycin (µg/mL) |
|-----------|-------------|-------------|--------------------|
| 43300     | 12.5        | > 50        | *5                 |
| 33591     | 25          | > 50        | *10                |

\*MIC of vancomycin.

**Table S5. Pearson's correlation coefficients between TPC and antioxidant activities of strain MUSC 125.**

| Antioxidant activities           |                                  |                          |
|----------------------------------|----------------------------------|--------------------------|
| ABTS radical scavenging activity | DPPH radical scavenging activity | Metal chelating activity |
| $r = 0.998^*$                    | $r = 0.942^*$                    | $r = 0.974^*$            |

\*Correlation was significant with a  $p$  value less than 0.05 level.

## Figures

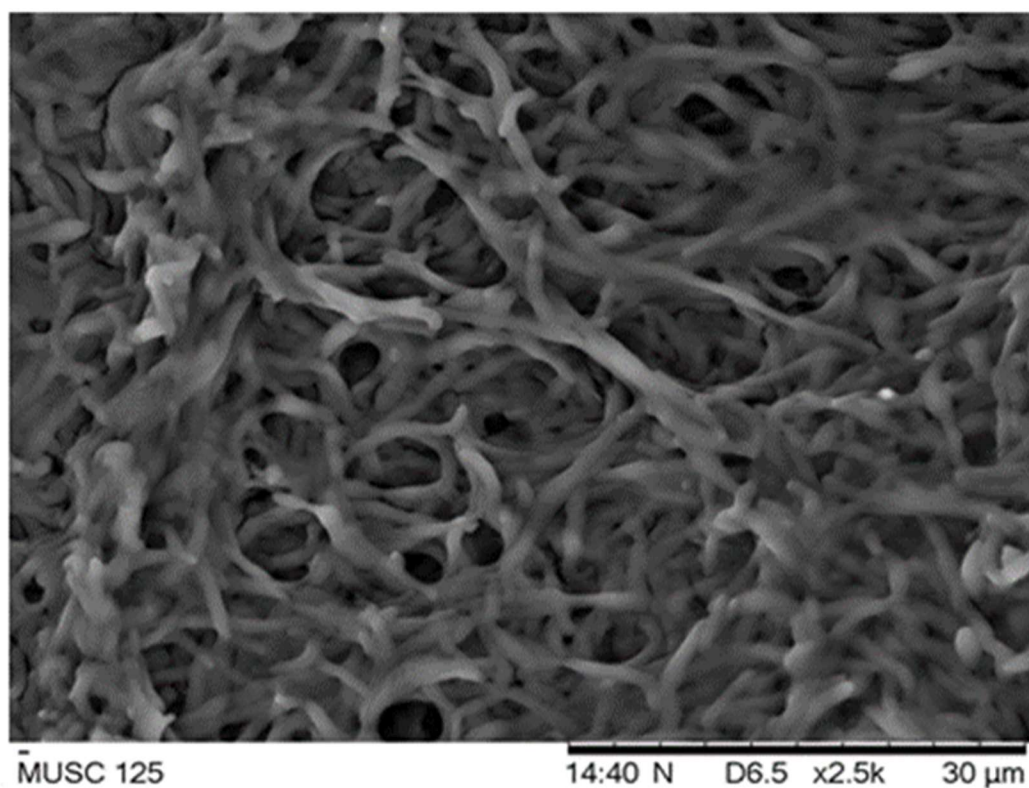

**Figure S1.** SEM image capturing the morphology of *Streptomyces* sp. strain MUSC 125. This appears to be filamentous with extensive branching, which is a general characteristic of *Streptomyces*.

**A**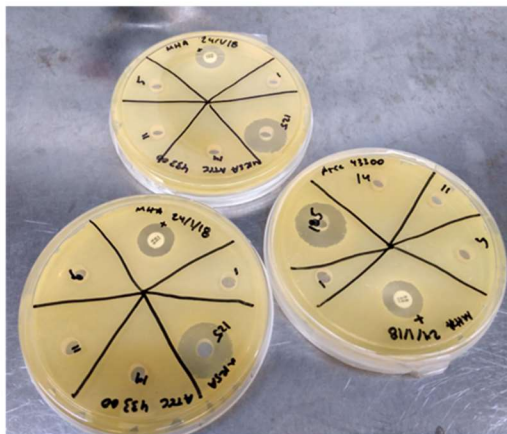**B**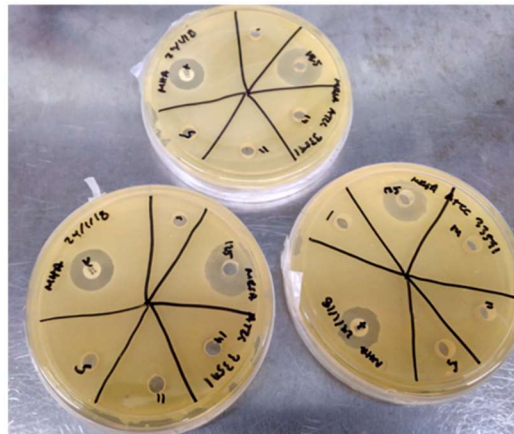

**Figure S2.** *In-vitro* anti-MRSA of the methanolic extract of strain MUSC 125 activity following agar well diffusion assay measured in terms of zone of inhibition at 10 mg against a) MRSA ATCC 43300 and b) MRSA ATCC 33591. Test done in triplicates.

**A**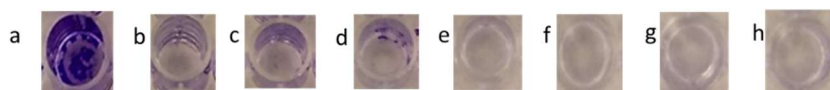**B**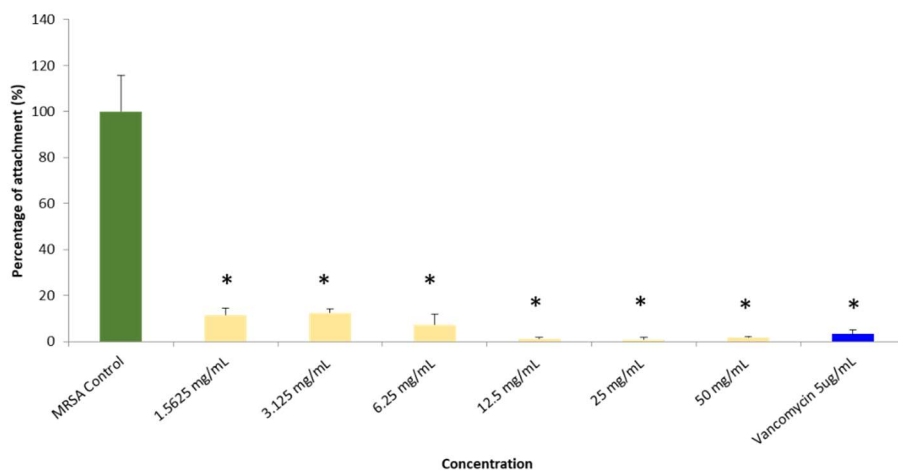

**Figure S3.** Anti-biofilm/anti-adherence activity of methanolic extract of *Streptomyces* sp. MUSC 125. 3A. Visual observation of effect of methanolic extract at a) Untreated bacteria; b) 1/8× MIC; c) 1/4× MIC; d) 1/2× MIC; e) 1×MIC; f) 2× MIC; g) 4× MIC; h) Positive control. 3B. Percentage attachment of untreated bacteria, treated bacteria with extract and vancomycin. Data are statistically significant at  $p < 0.05$ .

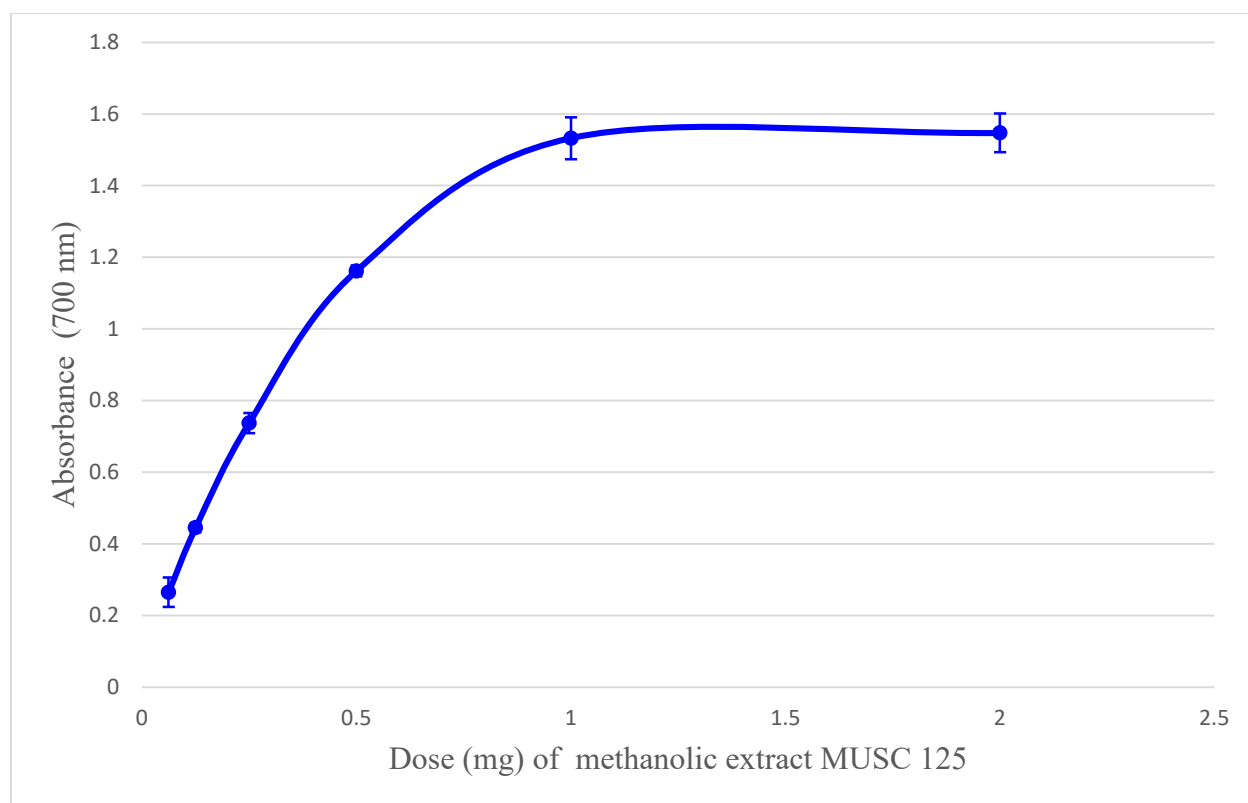

**Figure S4.** Ferric reducing activity of methanolic extract of *Streptomyces* sp. strain MUSC 125. The 6 doses (0.0625 mg, 0.125 mg, 0.25 mg, 0.5 mg, 1 mg and 2 mg), used in the experiment represent the amount of extract in each of the 6 concentrations (2.5mg/L, 5 mg/mL, 10 mg/mL, 20 mg/mL, 40 mg/mL and 80 mg/mL) tested present in 25  $\mu$ L volume. The experiment was run in triplicates ( $n = 3$ ). Data are statistically significant at  $p < 0.05$ .
